# Supplementary material
Source: Springer Nature journal article supplement (https://www.springermedizin.de/resource/supplementary/12877_2013_851_MOESM1_ESM.pdf/9440552)
Supplement: MOESM1 [file 9440552]

**Number of referrals from home care case managers and assisted living nurse practitioners/case coordinators**

n=203

**Number enrolled**

n=104

**Number included at baseline**

n=100

**Number of participants remaining at 3 month data collection**

n=88

**Number of participants remaining at 6 month data collection point**

n=75

**Withdrawals just after enrollment n=4**

Reasons:

Unable to complete ICIQ-FLUTS or TUG (3)

Family request (1)

**Dropouts at 3 months n=12**

Reasons

Did not recall being in study (2)

Transferred to long term care (1)

Move to other accommodation (2)

In hospital (2)

Recent hospitalization, unresolved delirium (1)

Unable to finish ICIQ-FLUTS due to poor health (1)

No longer interested (1)

Prolonged vacation (1)

Deceased (1)

**Dropouts at 6 months n=13**

Reasons

No longer interested (2)

Not feeling well (1)

In hospital (2)

Mobility decline severe enough to prevent completion of TUG (2)

Lost to follow up despite multiple attempts to contact (6)
